# Supplementary material for: A versatile, fast and unbiased method for estimation of gene-by-environment interaction effects on biobank-scale datasets
Source: bioRxiv or medRxiv preprint supplement (doi:10.1101/2021.04.24.21255884), 2021-04-27
Supplement: Supplementary file [file media-1.zip]

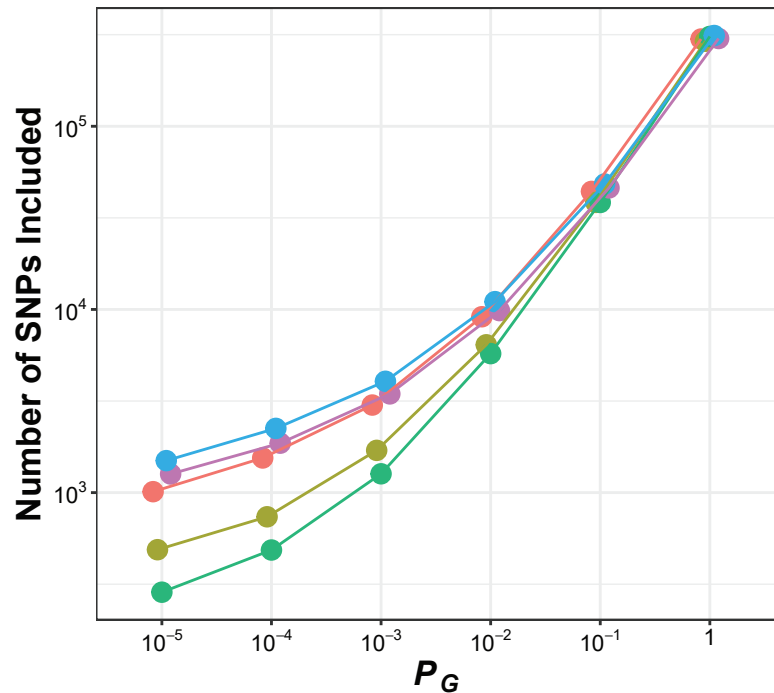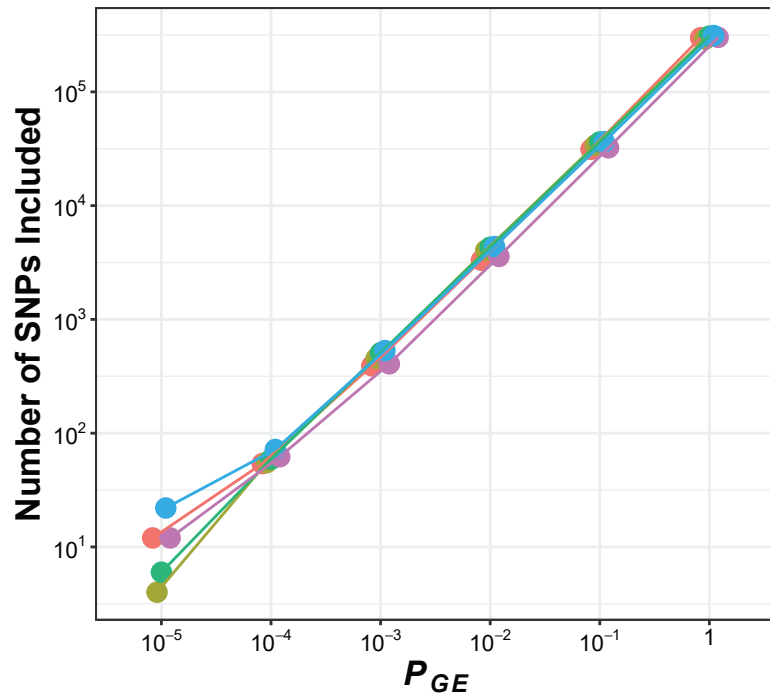

### Biomarker

- Apolipoprotein B
- Bilirubin
- HbA1c
- HDL-Cholesterol
- Total Cholesterol
